# Supplementary material for: Drug-Loaded Hydrogels for Intraocular Lenses with Prophylactic Action against Pseudophakic Cystoid Macular Edema
Source: MDPI journal article supplement (doi:10.3390/pharmaceutics13070976), 2021-06-28
Supplement: s1 [file s1]

# Supplementary Materials: Drug-Loaded Hydrogels for Intraocular Lenses with Prophylactic Action against Pseudophakic Cystoid Macular Edema

Nadia Toffoletto, Madalena Salema-Oom, Soledad Anguiano Igea, Carmen Alvarez-Lorenzo and Benilde Saramago, Ana Paula Serro

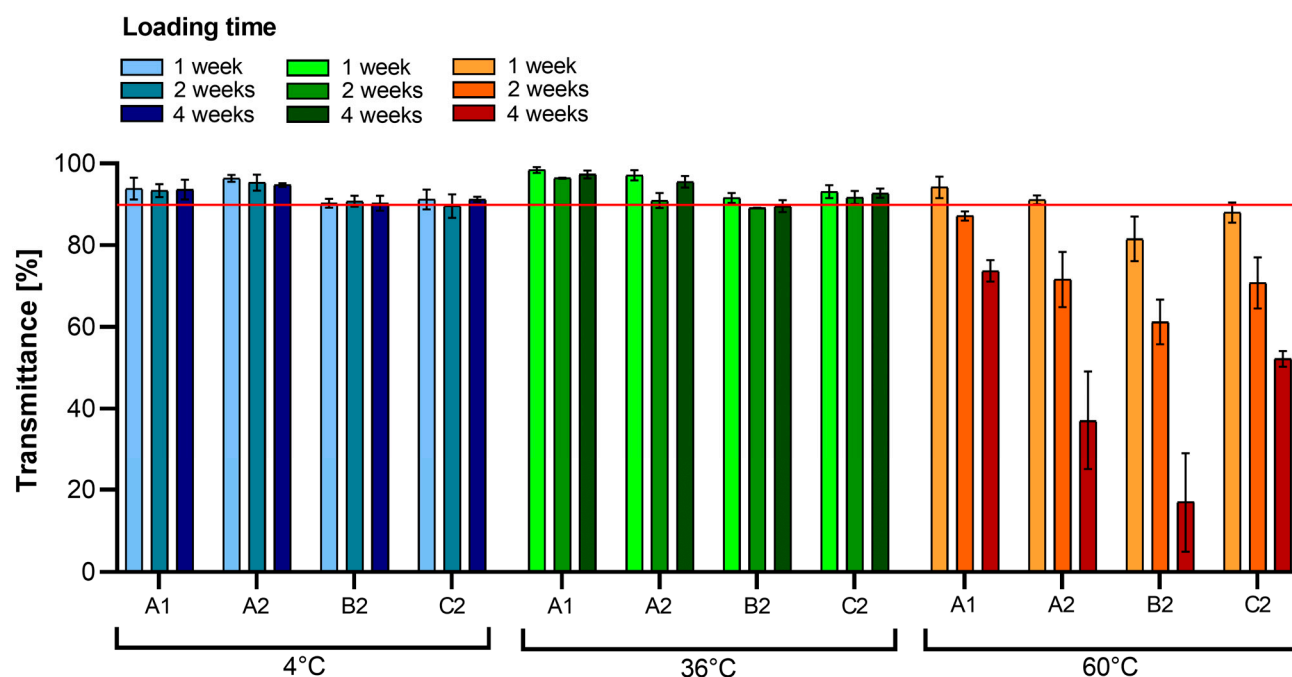

**Figure S1.** Light transmittance, measured at  $\lambda = 550$  nm, of A1, A2, B2 and C2 hydrogels after dual-drug loading with different soaking parameters: temperature (4 °C, 36 °C, 60 °C) and soaking time (1 week, 2 weeks, 3 weeks). The minimum optical requirement for the materials to be suitable as IOLs was set to 90% transmittance, indicated by the red line.

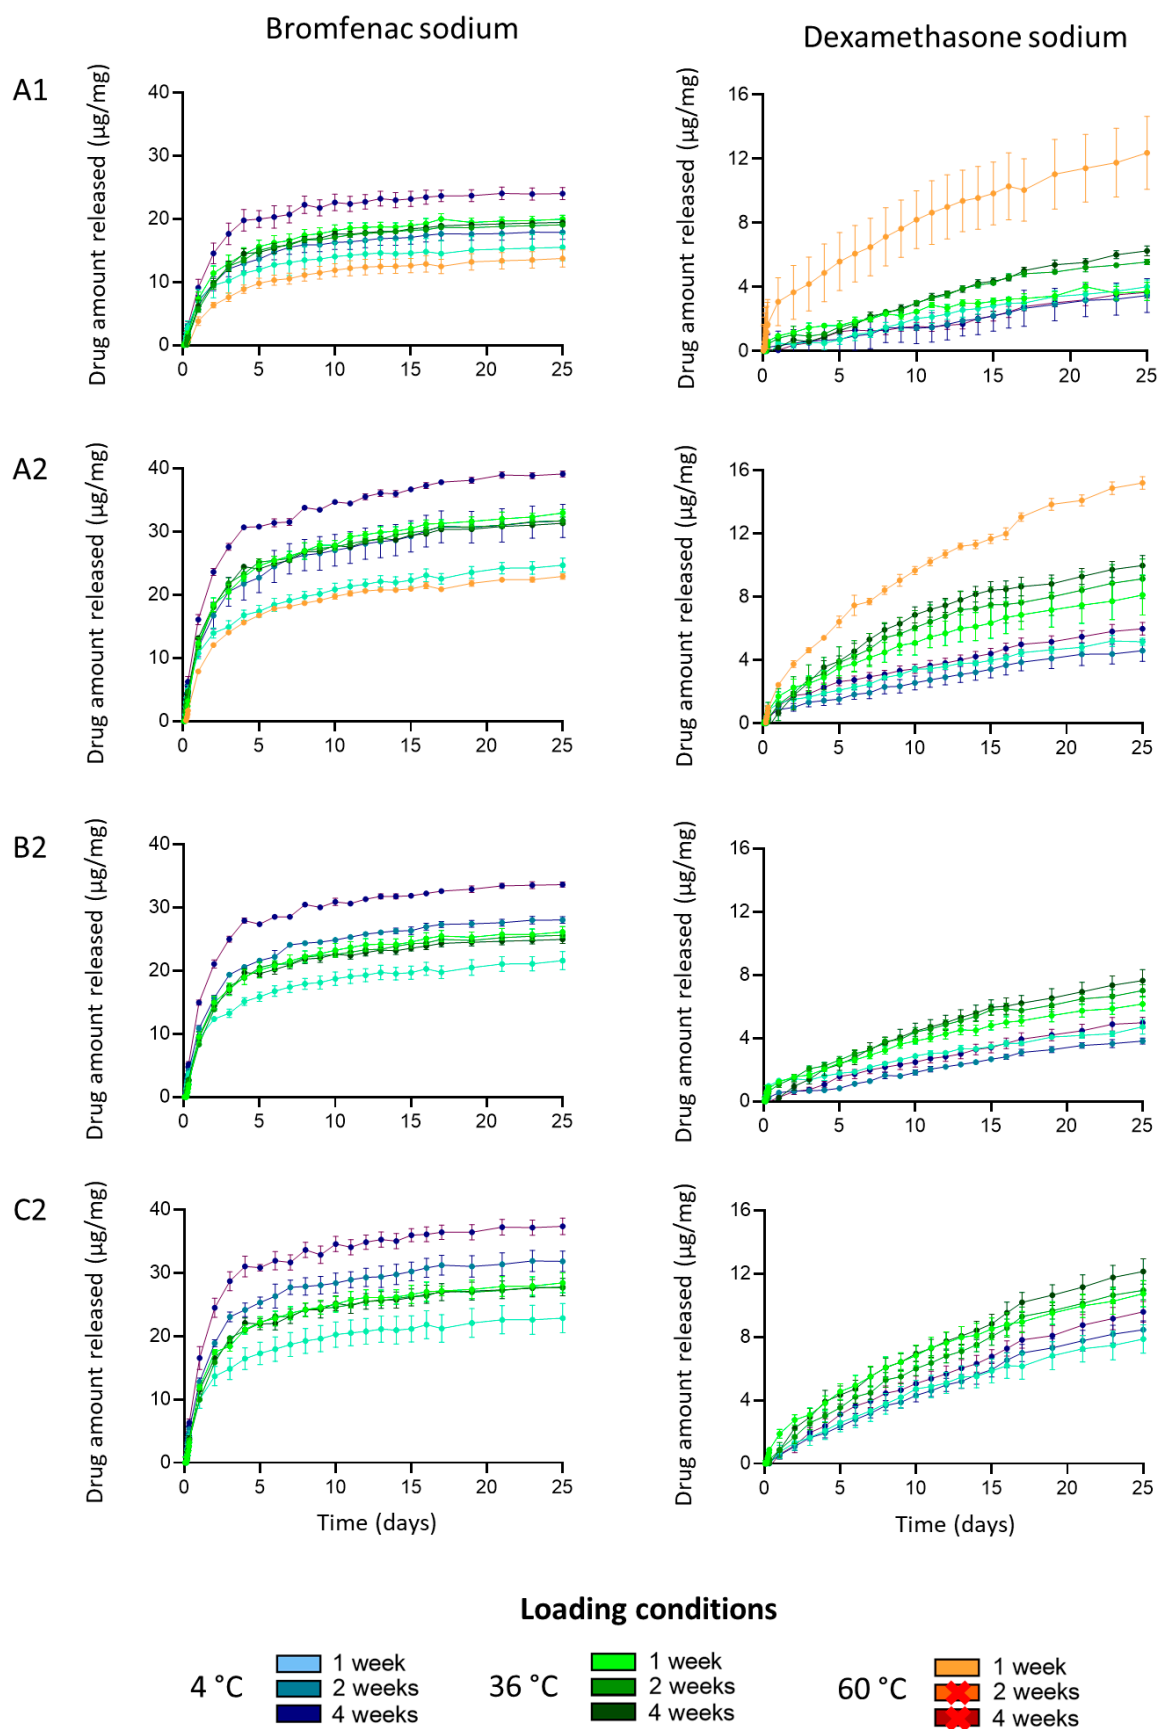

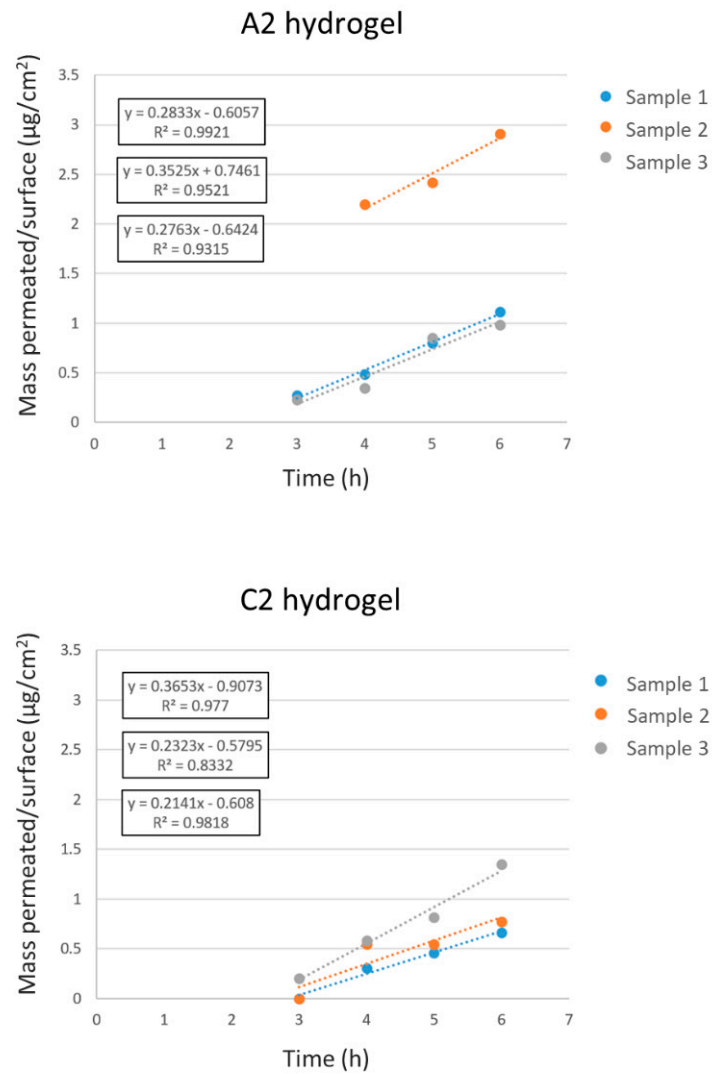

**Figure S3.** Linear regression of the cumulative mass of bromfenac sodium permeated through the cornea. The experiment was conducted placing dual-loaded A2 hydrogel (**top**) or C2 hydrogel (**bottom**) in the Franz cell's donor chamber. Excised porcine corneas were placed with the endothelium facing the donor chamber.

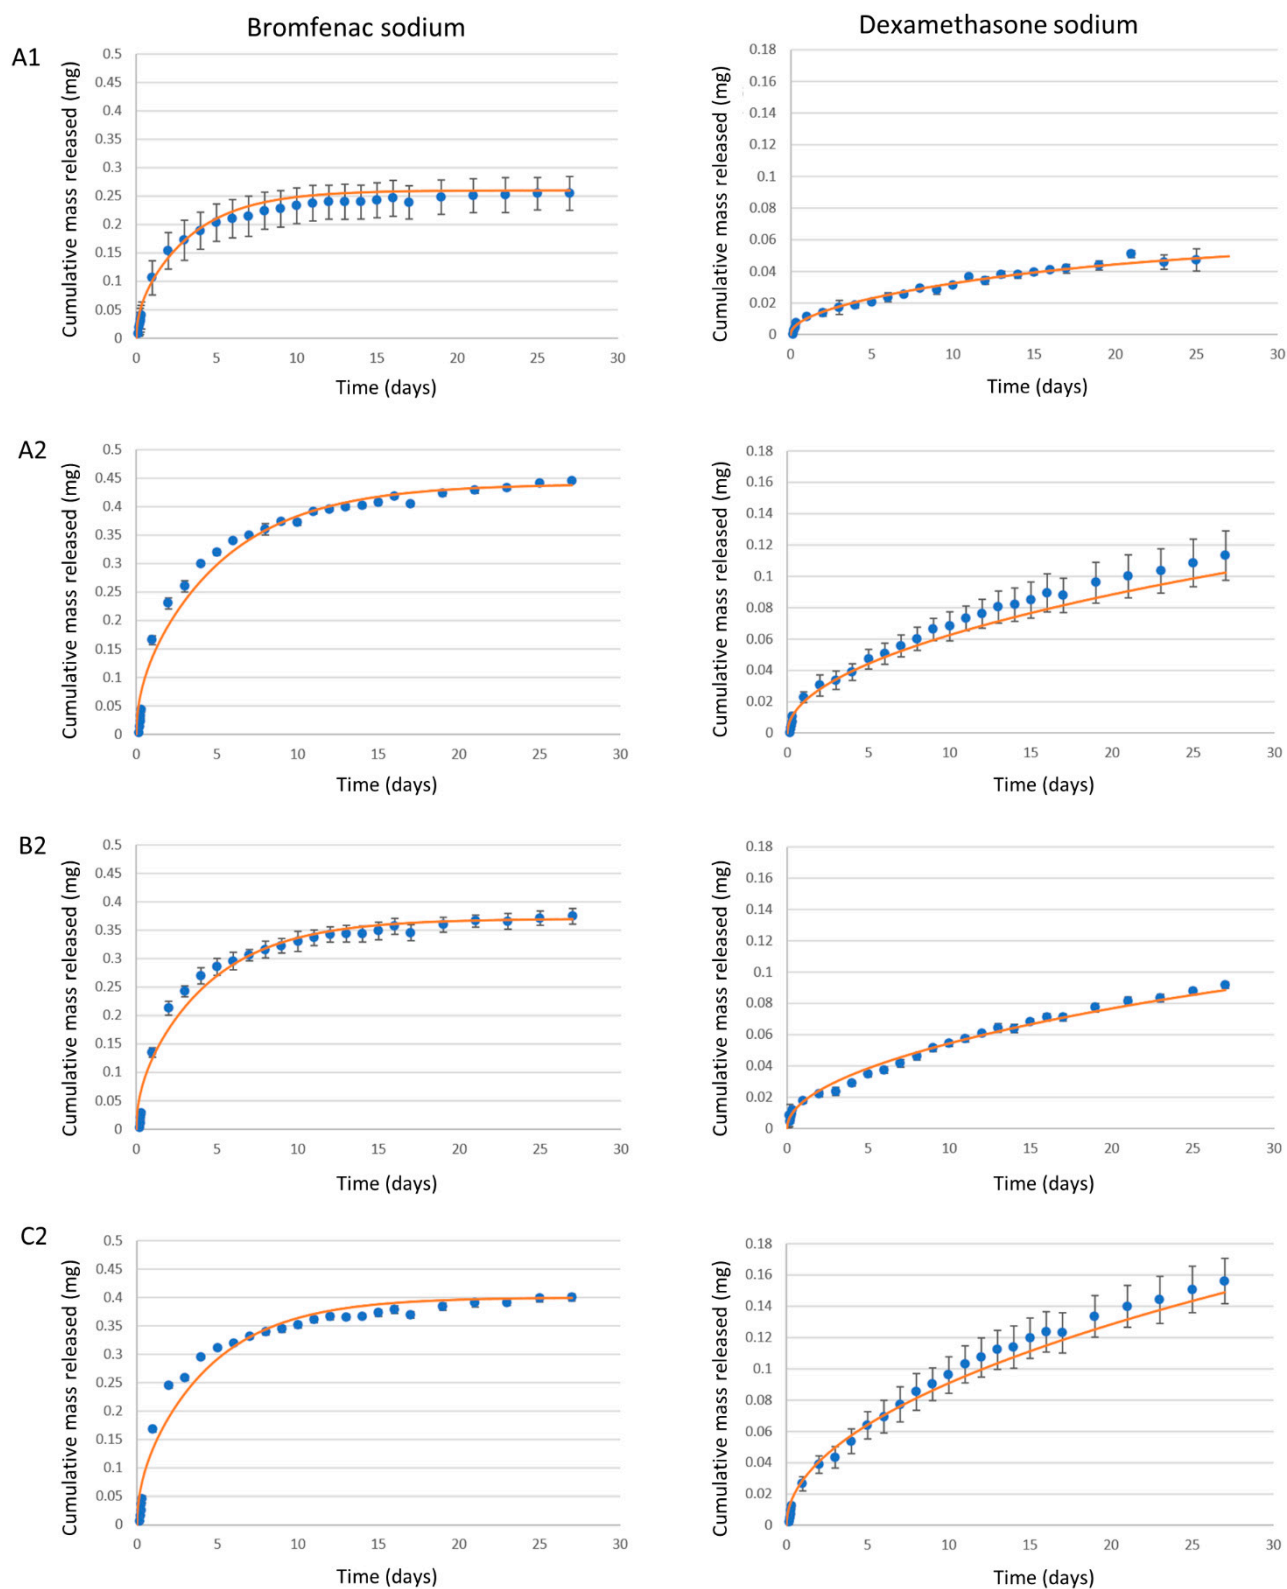

**Figure S4.** Determination of the effective diffusivity ( $D$ ) by curve-fitting of the cumulative amount of drug released from A1, A2, B2 and C2 hydrogels over time *in vitro* to a one-dimensional diffusion equation.

**Table S1.** Parameters used for the calculation of the average mesh size  $\xi$ : density of the dry hydrogel ( $\rho$ ), zero-frequency shear storage modulus ( $G'(0)$ ) and volume fraction of the polymer in the swollen network ( $\phi$ ). The other values are:  $l_{c-c} = 0.154$  nm,  $C_F = 6.9$  (assuming the value for polyHEMA [Peppas *et al.*, J Biomed Mater Res, 1985,19, 397-411]), and  $M_r = 134.62$  g/mol for HEMA-BEM (80:20) hydrogels.

| Code | $\rho$ [g/cm <sup>3</sup> ] | $G'(0)$ [MPa] | $\phi$<br>[mm <sup>3</sup> /mm <sup>3</sup> ] | $\xi$<br>[nm] |
|------|-----------------------------|---------------|-----------------------------------------------|---------------|
| A1   | 1.197                       | 1.392         | 0.87                                          | 2.30          |
| A2   | 1.245                       | 0.755         | 0.78                                          | 3.22          |
| A3   | 1.339                       | 0.992         | 0.70                                          | 2.93          |
| B1   | 1.157                       | 1.159         | 0.85                                          | 2.48          |
| B2   | 1.261                       | 0.717         | 0.80                                          | 3.31          |
| B3   | 1.171                       | 0.948         | 0.88                                          | 2.76          |
| C1   | 1.268                       | 1.181         | 0.80                                          | 2.59          |
| C2   | 1.239                       | 0.641         | 0.80                                          | 3.47          |
| C3   | 1.231                       | 0.924         | 0.84                                          | 2.87          |
